# Supplementary material for: Feeding VLBWs with Mother’s Own Milk. Italian Monocentric Analysis
Source: Preprints.org preprint supplement (doi:10.20944/preprints202305.0048.v1), 2023-05-02
Supplement: Supplementary file 2 [file supplementary]

**Table 1.**

|  | Overall (N=97) |
| --- | --- |
| **GA** |  |
| Mean (SD) | 28.56 (2.73) |
| Median (Q1, Q3) | 29.00 (27.00, 30.00) |
| Min - Max | 23.00 - 35.00 |
| Non missing N | 97 |
| **Birth Weight** |  |
| Mean (SD) | 1091.48 (287.93) |
| Median (Q1, Q3) | 1110.00 (870.00, 1320.00) |
| Min - Max | 520.00 - 1495.00 |
| Non missing N | 97 |
| **Year** |  |
| 2017 | 24 (24.7%) |
| 2018 | 24 (24.7%) |
| 2019 | 24 (24.7%) |
| 2020 | 8 (8.2%) |
| 2021 | 17 (17.5%) |
| Non missing N | 97 |
| **Single/Twin** |  |
| T | 36 (37.5%) |
| S | 60 (62.5%) |
| Non missing N | 96 |
| Missing N | 1 |
| **Delivery** |  |
| V | 14 (14.6%) |
| CS | 82 (85.4%) |
| Non missing N | 96 |
| Missing N | 1 |
| **MA** |  |
| Mean (SD) | 32.62 (6.11) |
| Median (Q1, Q3) | 33.00 (28.50, 37.50) |
| Min - Max | 19.00 - 46.00 |
| Non missing N | 95 |
| Missing N | 2 |
| **DM ml** |  |
| Mean (SD) | 4015.88 (3840.05) |
| Median (Q1, Q3) | 2900.00 (500.00, 7100.00) |
| Min - Max | 12.00 - 12200.00 |
| Non missing N | 68 |
| Missing N | 29 |
| **Start MEF** |  |
| Mean (SD) | 1.78 (1.03) |
| Median (Q1, Q3) | 2.00 (1.00, 2.00) |
| Min - Max | 1.00 - 7.00 |
| Non missing N | 96 |
| Missing N | 1 |
| **MOM** |  |
| NO | 29 (30.5%) |
| YES | 66 (69.5%) |
| Non missing N | 95 |
| Missing N | 2 |
| **Start MOM** |  |
| Mean (SD) | 4.11 (1.93) |
| Median (Q1, Q3) | 4.00 (3.00, 5.00) |
| Min - Max | 1.00 - 12.00 |
| Non missing N | 65 |
| Missing N | 32 |
| **FEF** |  |
| Mean (SD) | 18.53 (14.30) |
| Median (Q1, Q3) | 15.00 (9.00, 22.00) |
| Min - Max | 3.00 - 80.00 |
| Non missing N | 86 |
| Missing N | 11 |
| **Days of hospitalization** |  |
| Mean (SD) | 62.14 (25.76) |
| Median (Q1, Q3) | 58.00 (45.25, 76.00) |
| Min - Max | 22.00 - 161.00 |
| Non missing N | 94 |
| Missing N | 3 |
| **Weight at discharge** |  |
| Mean (SD) | 2538.55 (529.59) |
| Median (Q1, Q3) | 2390.00 (2157.50, 2802.50) |
| Min - Max | 1781.00 - 4960.00 |
| Non missing N | 96 |
| Missing N | 1 |
| **Feeding at discharge** |  |
| FM | 51 (52.6%) |
| MOM | 35 (36.1%) |
| MOM+FM | 11 (11.3%) |
| Non missing N | 97 |
| **Average daily weight increment** |  |
| Mean (SD) | 24.02 (7.22) |
| Median (Q1, Q3) | 23.00 (19.67, 26.85) |
| Min - Max | 12.20 - 71.30 |
| Non missing N | 92 |
| Missing N | 5 |

**Table n° 2**

**Trend over the years**

| **Year** | **2017** | **2018** | **2019** | **2020** | **2021** | **p** |
| --- | --- | --- | --- | --- | --- | --- |
| **n°** | **24** | **24** | **24** | **8** | **17** |  |
| **GA (mean (SD))** | 27.29 (2.37) | 28.58 (2.89) | 29.00 (2.59) | 29.25 (3.28) | 29.35 (2.57) | 0.097 |
| **Weight (mean (SD))** | 1030.00 (316.32) | 1085.46 (281.31) | 1139.29 (298.99) | 1052.50 (243.35) | 1137.65 (270.64) | 0.680 |
| **Sing_Twins = S (%)** | 17 (70.83) | 16 (66.67) | 15 (65.22) | 5 ( 62.50) | 7 ( 41.18) | 0.372 |
| **CS (%)** | 18 (78.26) | 21 (87.50) | 18 (75.00) | 8 (100.00) | 17 (100.00) | 0.117 |
| **Maternal age (mean (SD))** | 31.86 (6.15) | 32.38 (6.98) | 31.04 (5.71) | 33.75 (4.13) | 35.65 (5.48) | 0.168 |
| **MOM = YES (%)** | 16 (66.67) | 15 (62.50) | 21 (91.30) | 1 ( 14.29) | 13 ( 76.47) | 0.003 |
| **Start MOM (mean (SD))** | 4.44 (2.16) | 4.47 (2.53) | 4.00 (1.63) | 4.00 (0.00) | 3.30 (1.16) | 0.602 |
| **DM ml (mean (SD))** | 3211.25 (3324.12) | 4599.29 (4045.35) | 3200.57 (3510.58) | 9883.33 (2116.99) | 2125.00 (1935.94) | <0.001 |
| **Start MEF (mean (SD))** | 1.52 (0.73) | 2.04 (1.40) | 1.67 (0.48) | 2.38 (1.92) | 1.65 (0.61) | 0.180 |
| **FEF (mean (SD))** | 22.77 (21.76) | 15.58 (7.37) | 16.22 (10.72) | 20.88 (14.95) | 19.89 (12.75) | 0.433 |
| **Length of stay (mean (SD))** | 65.71 (30.32) | 68.54 (28.76) | 60.58 (22.10) | 59.50 (19.34) | 52.12 (21.49) | 0.331 |
| **Average daily weight increment (mean (SD))** | 21.08 (3.44) | 22.27 (4.46) | 23.83 (5.72) | 21.55 (3.95) | 31.36 (11.25) | <0.001 |

GA Gestational Age, MOM: Mother’s Own Milk, CS: Cesarean Section, MEF: Minimal Enteral Feeding, FEF: Full Enteral Feeding, DM: Donor Milk

**Table n°3**

**MOM feeding during hospitalization**

|  | **NO** | **YES** | **p** |
| --- | --- | --- | --- |
| **n°** | **29** | **66** |  |
| **GA** (mean (SD)) | 29.28 (2.95) | 28.23 (2.57) | 0.084 |
| **Weight** (mean (SD)) | 1169.24 (291.62) | 1059.64 (281.78) | 0.087 |
| **Sing_Twins** = S (%) | 14 (50.00) | 44 (66.67) | 0.198 |
| **CS** (%) | 24 (82.76) | 56 (86.15) | 0.910 |
| **Maternal Age** (mean (SD)) | 32.00 (7.19) | 32.83 (5.68) | 0.553 |
| **Start MOM** (mean (SD)) | 3.00 (2.83) | 4.07 (1.84) | 0.429 |
| **Length of stay** (mean (SD)) | 57.34 (27.31) | 64.59 (25.00) | 0.213 |
| **Average daily weight increment** (mean (SD)) | 23.38 (4.44) | 24.43 (8.26) | 0.527 |
| **Start MEF** (mean (SD)) | 1.90 (1.18) | 1.72 (0.98) | 0.457 |
| **FEF** (mean (SD)) | 14.88 (7.30) | 19.53 (15.73) | 0.162 |

GA: Gestational Age, MOM: Mother’s Own Milk, CS: Cesarean Section, MEF: Minimal Enteral Feeding, FEF: Full Enteral Feeding

**Table n°4**

**Feeding at discharge**

|  | **FM vs MOM vs MOM+FM** | **FM vs MOM** |
| --- | --- | --- |
|  | **p** | **p** |
| **GA (mean (SD))** | 0.101 | 0.032 |
| **Weight (mean (SD))** | 0.182 | 0.065 |
| **Sing_Twins = S (%)** | 0.584 | 0.460 |
| **CS (%)** | 0.323 | 0.538 |
| **Maternal Age (mean (SD))** | 0.048 | 0.059 |
| **Start MOM (mean (SD))** | 0.032 | 0.009 |
| **Length of stay (mean (SD))** | 0.622 | 0.733 |
| **Average daily weight increment (mean (SD))** | 0.845 | 0.562 |
| **Start MEF (mean (SD))** | 0.719 | 0.670 |
| **FEF (mean (SD))** | 0.225 | 0.620 |

GA: Gestational Age, MOM: Mother’s Own Milk, CS: Cesarean Section, MEF: Minimal Enteral Feeding, FEF: Full Enteral Feeding, FM: Formulated Milk


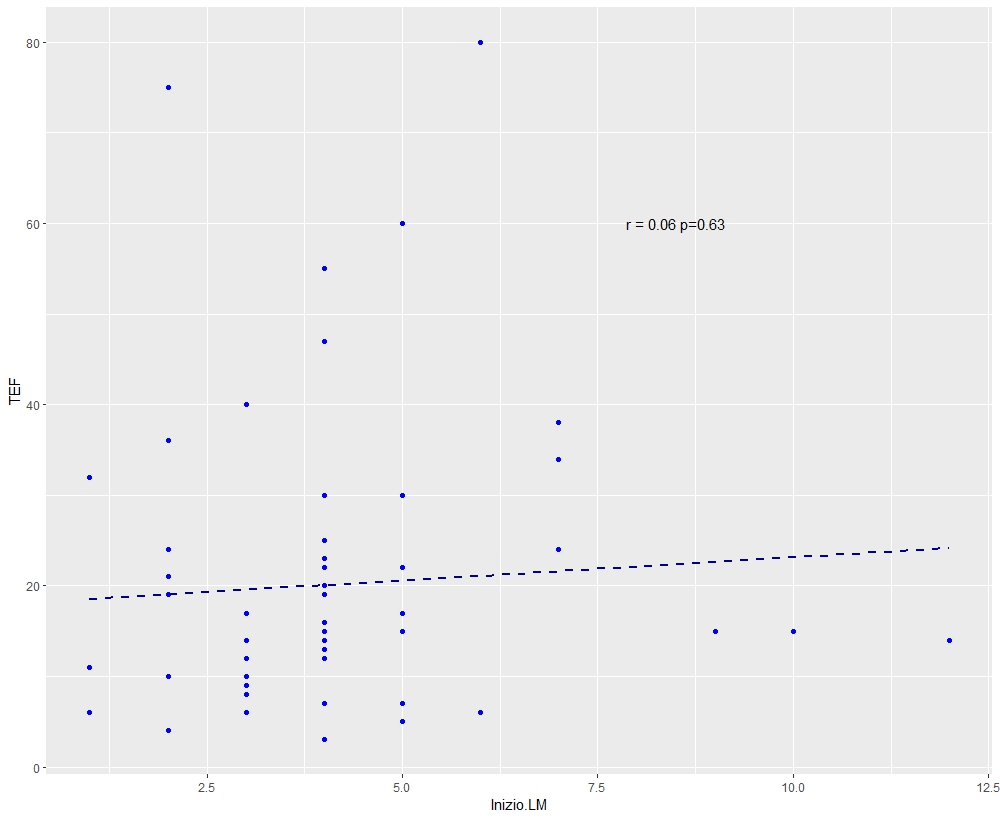


**Figure 1**

FEF

**Start MOM**

**Vs**

**FEF**

Start MOM
